# Supplementary material for: Cambrian lobopodians and extant onychophorans provide new insights into early cephalization in Panarthropoda
Source: PubMed Central journal article supplement — Nat Commun. 2012 Dec 11;3:1261–. doi: 10.1038/ncomms2272 (PMC3535342; doi:10.1038/ncomms2272), 2012-12-11
Supplement: ncomms2272-s1.pdf [file ncomms2272-s1.pdf]

## **Supplementary Information**

# **Cambrian lobopodians and extant onychophorans provide new insights into early cephalisation in Panarthropoda**

Qiang Ou, Degan Shu & Georg Mayer

## Supplementary figures

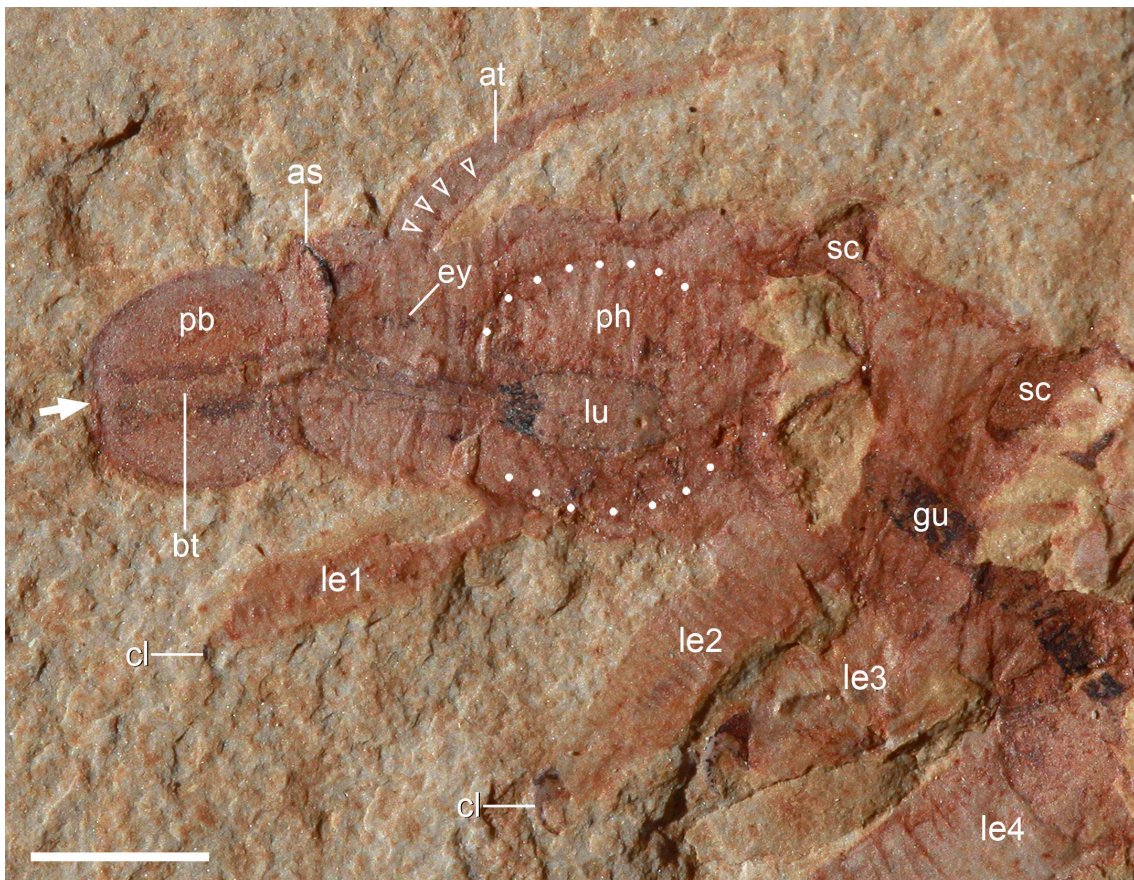

**Supplementary Figure S1 | Anterior anatomy of *Onychodictyon ferox*.** Laterally compressed specimen ELEL-SJ101888A showing terminal mouth (arrow), proboscis, arcuate sclerite, eye, antenniform appendage, attachment sites of antennal branches (arrowheads), and a bulbous pharynx (dotted lines). as, arcuate sclerite; at, antenniform appendage; bt, buccal tube; cl, claw; ey, eye; gu, gut; le1–4, walking lobopods 1–4; lu, pharyngeal lumen; pb, proboscis; ph, pharynx; sc, sclerotized plate. Scale bar: 2 mm.

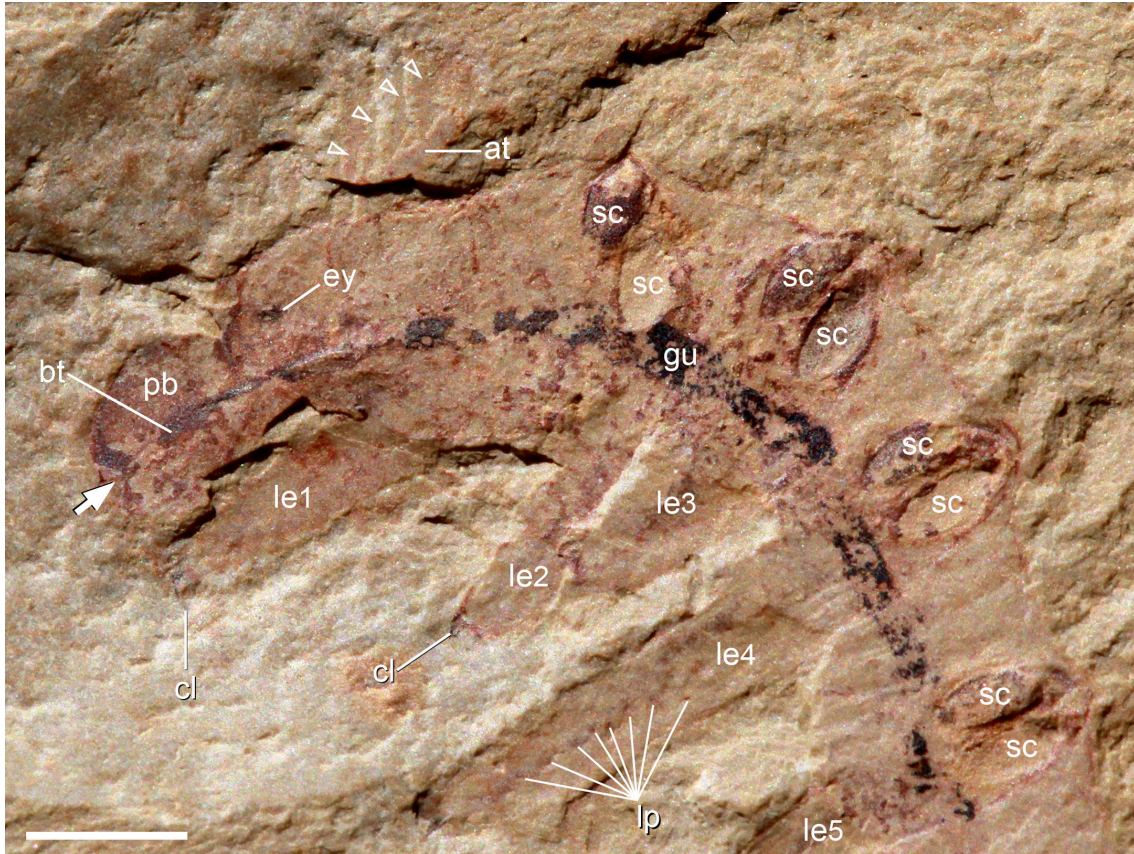

**Supplementary Figure S2 | Anterior anatomy of *Onychodictyon ferox*.** Dorsolaterally compressed specimen ELEL-SJ100272A showing terminal mouth (arrow), proboscis, antenniform appendage with branches (arrowheads), and attachment sites of papillae on the fourth lobopod. at, antenniform appendage; bt, buccal tube; cl, claw; ey, eye; gu, gut; le1–5, walking lobopods 1–5; lp, attachment sites of leg papillae; pb, proboscis; sc, sclerotized plate. Scale bar: 2 mm.

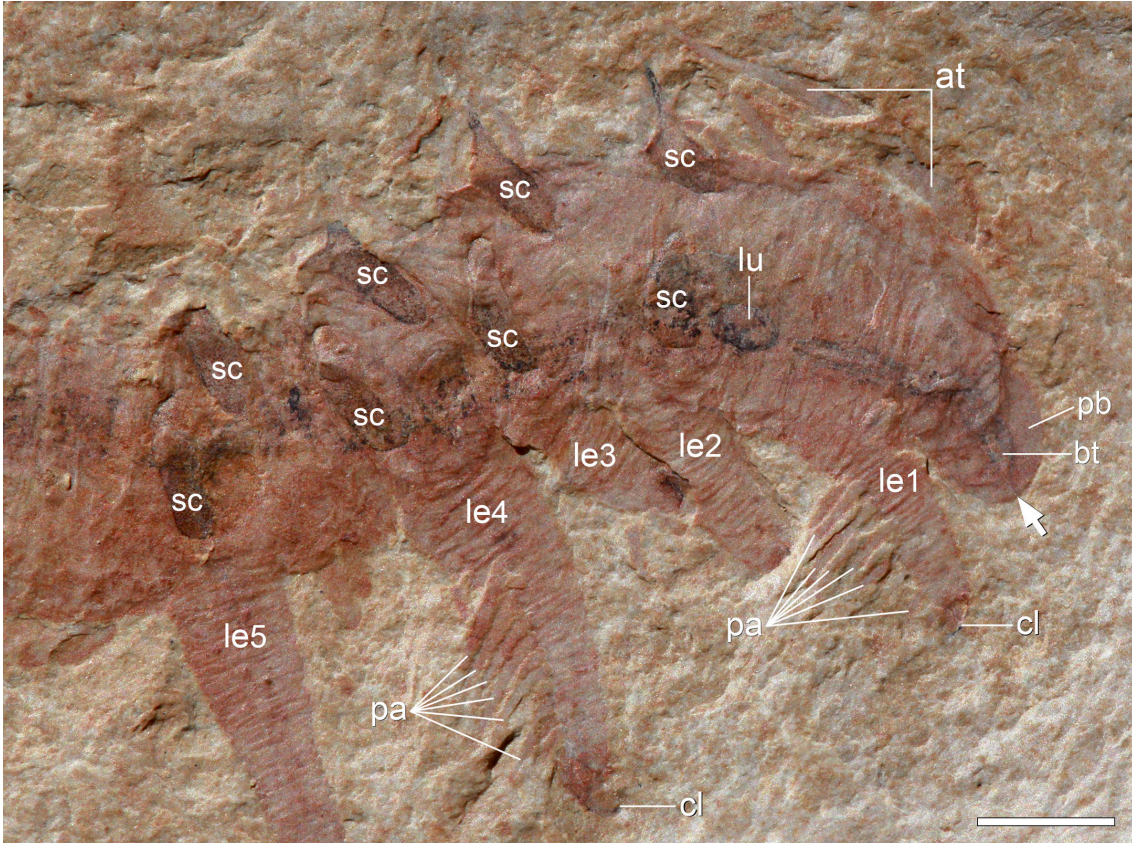

**Supplementary Figure S3 | Head structures and leg papillae of *Onychodictyon ferox*.** Dorsolaterally compressed specimen ELEL-SJ101703A showing terminal mouth (arrow), proboscis, antenniform appendage, and a row of long papillae on the first and the fourth lobopods. at, antenniform appendage; bt, buccal tube; cl, claw; le1–5, walking lobopods 1–5; lu, pharyngeal lumen; pa, leg papillae; pb, proboscis; sc, sclerite. Scale bar: 2 mm.

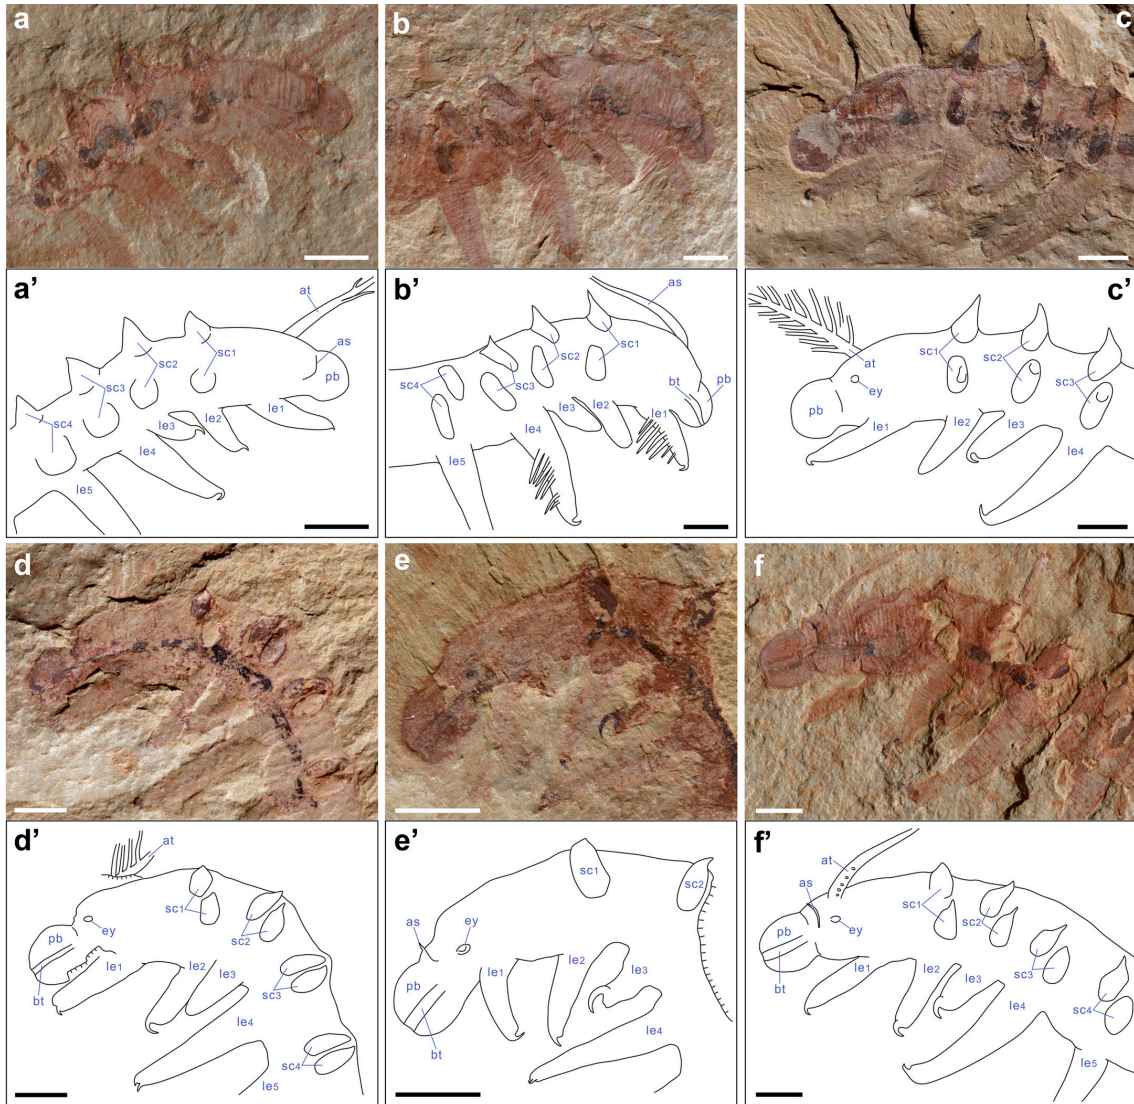

**Supplementary Figure S4 | Anterior anatomy of *Onychodictyon ferox*.** Note the lack of dorsal sclerotised plates in the first leg-bearing segment. (a–f) Micrographs of specimens ELEL-SJ101436A, ELEL-SJ101703A, ELEL-SJ100635, ELEL-SJ100272A, ELEL-SJ100307B and ELEL-SJ101888B. (a'–f') Interpretive line drawings of corresponding specimens. Alimentary canal is omitted for clarity. as, arcuate sclerite; at, antenniform appendage; ey, eye; le1–le5 walking lobopods 1–5; pb, proboscis; sc1–sc4, sclerotised plates 1–4; bt, buccal tube. Scale bars, 2 mm.

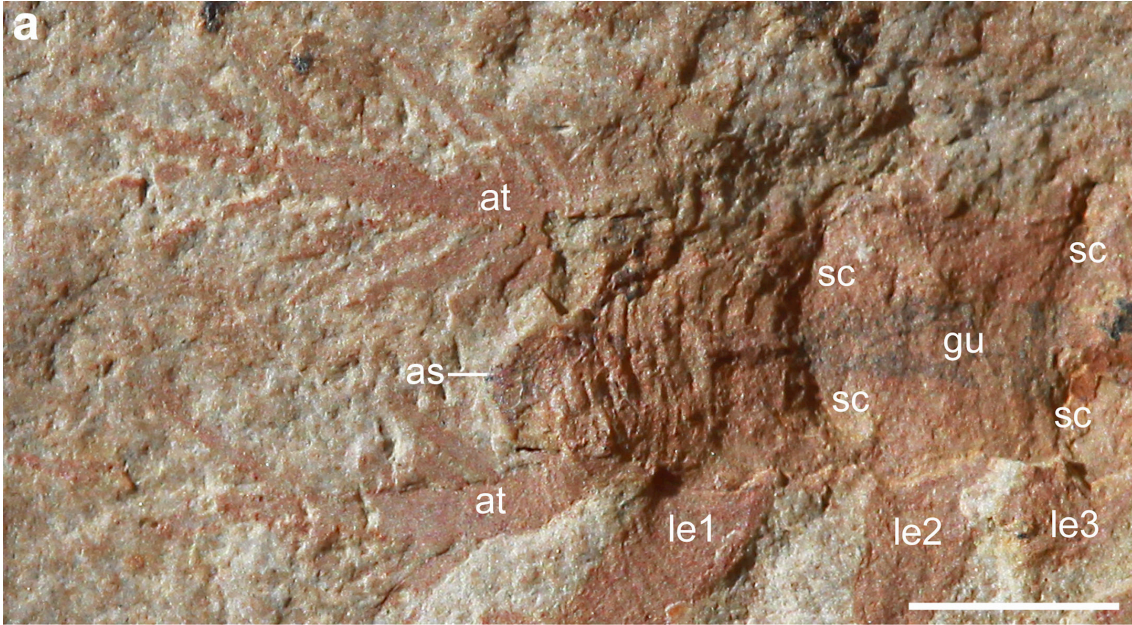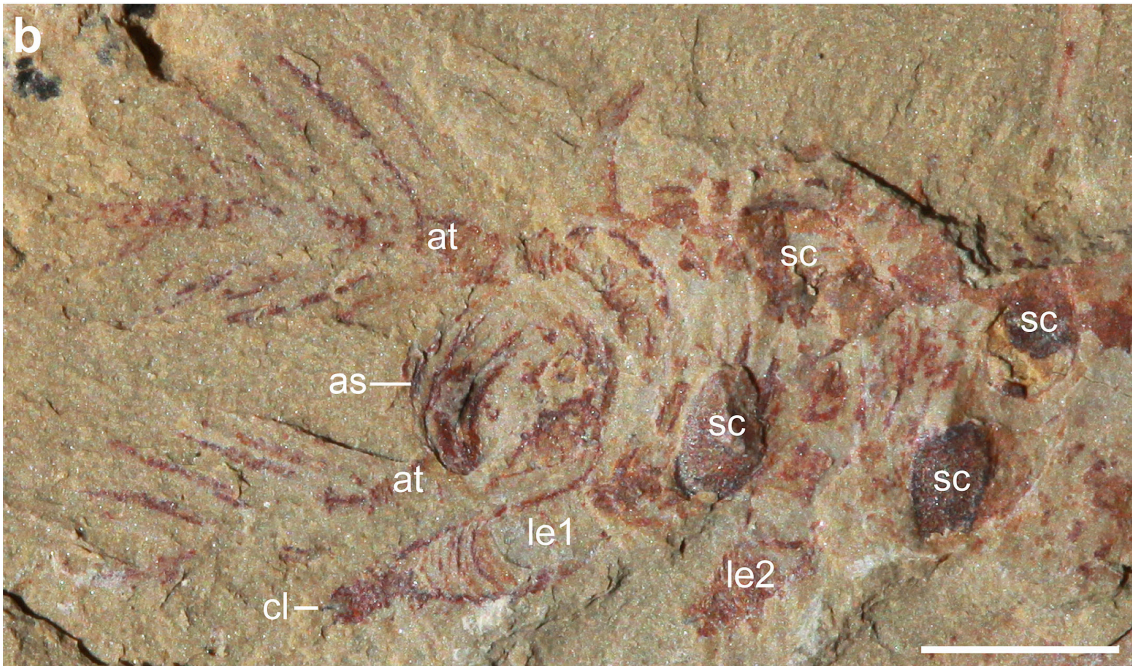

**Supplementary Figure S5 | Paired, branched antenniform appendages in dorsoventrally compressed specimens of *Onychodictyon ferox*. Proboscis is not seen. (a) Specimen ELEL-SJ081201A. (b) Specimen ELEL-SJ100862A. as, arcuate sclerite; at, antenniform appendage; cl, claw; gu, gut; le1–le3, walking lobopods 1–3; sc, sclerotised plate; Scale bars, 2 mm.**

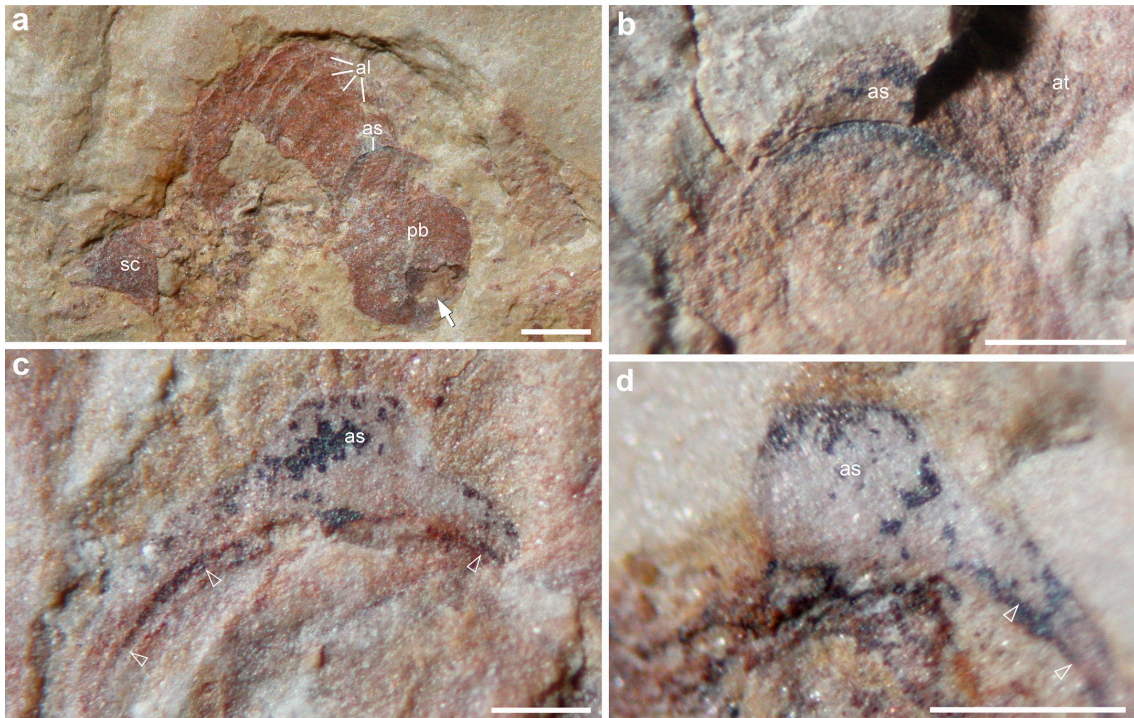

**Supplementary Figure S6 | Morphology and position of the arcuate sclerite in *Onychodictyon ferox*.** (a) Anterior end of twisted specimen ELEL-SJ100910A showing dorsolateral aspect of arcuate sclerite and proboscis. Arrow points to the mouth. (b–d) Dorsoventrally compressed specimens ELEL-SJ101534A, ELEL-SJ100917A and ELEL-SJ101842B showing details of arcuate sclerite. Note dark color and arc-like shape of the inner border (arrowheads). al, body annulation; as, arcuate sclerite; at, antenna; pb, proboscis; sc, sclerotized plate. Scale bars, 1 mm in **a**; 200  $\mu$ m in **c**; 500  $\mu$ m in **b**, **d**.

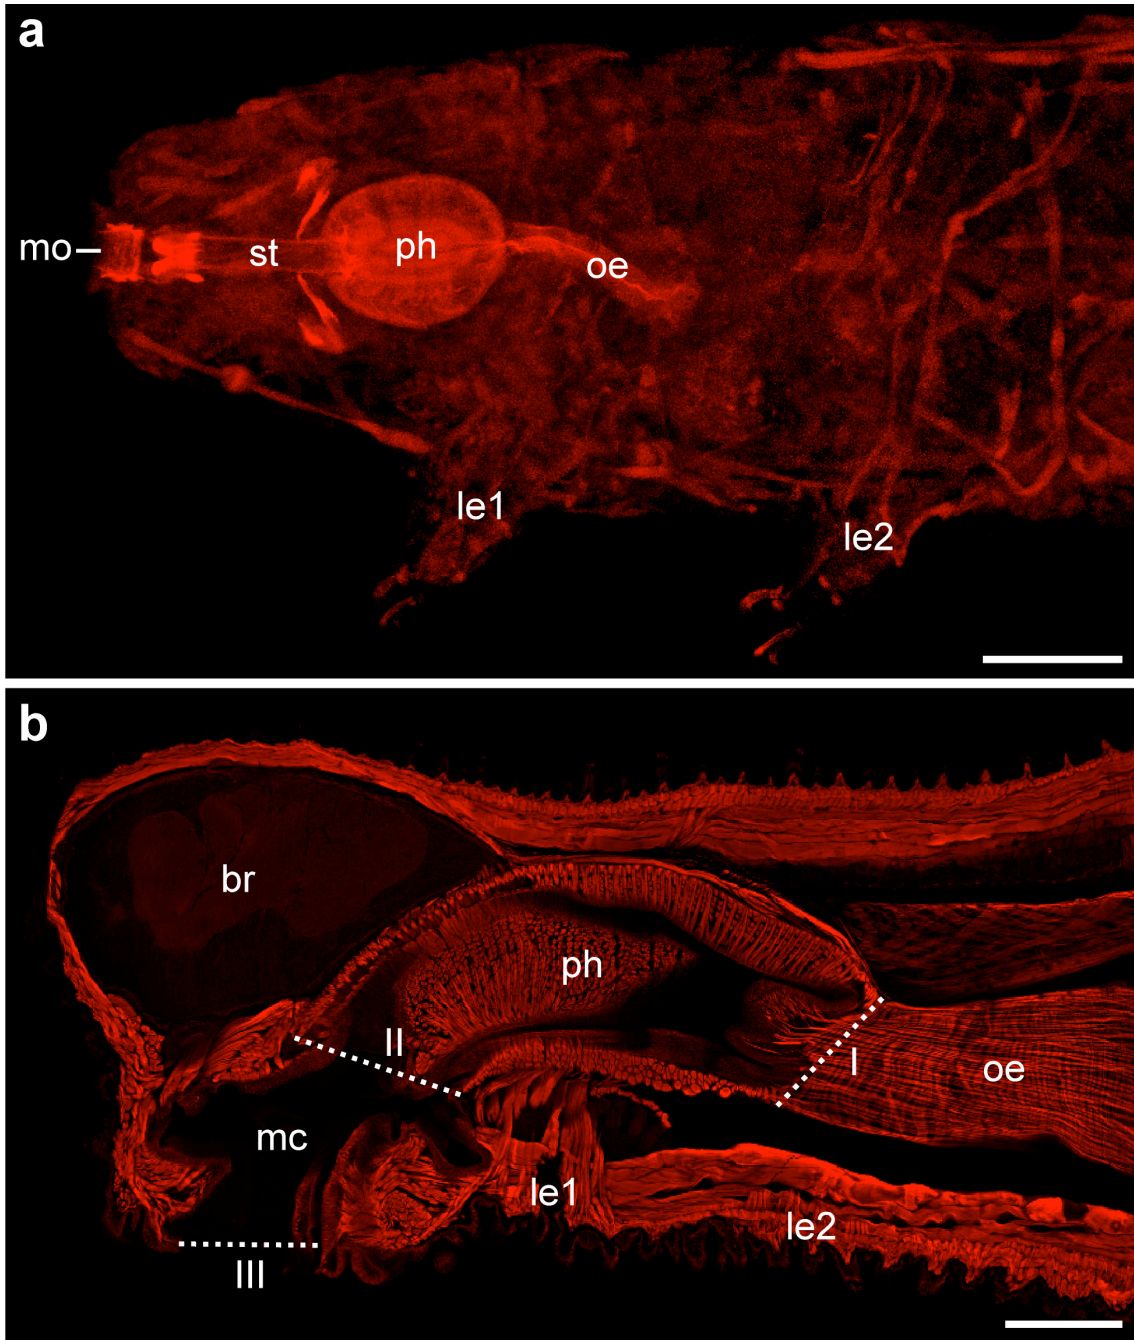

**Supplementary Figure S7 | Foregut structures in Tardigrada and Onychophora.** Note the presence of a bulbous, sucrorial pharynx in both groups. Phalloidin-rhodamine labelling for f-actin; confocal micrographs. (a) Anterior end of the tardigrade *Macrobiotus* sp. in lateral view. (b) Vibratome section of the anterior end of the onychophoran *Euperipatoides rowelli*. Dotted lines with Roman numerals (I–III) indicate areas corresponding to the first (part of the blastopore), second (stomodaeum), and third embryonic mouth openings (=definitive mouth opening). br, brain; le1–le2, position of legs/lobopods 1–2; mc, mouth cavity; mo, mouth opening; oe, oesophagus; ph, pharynx; st, stylet. Scale bars, 25  $\mu$ m in a, 300  $\mu$ m in b.



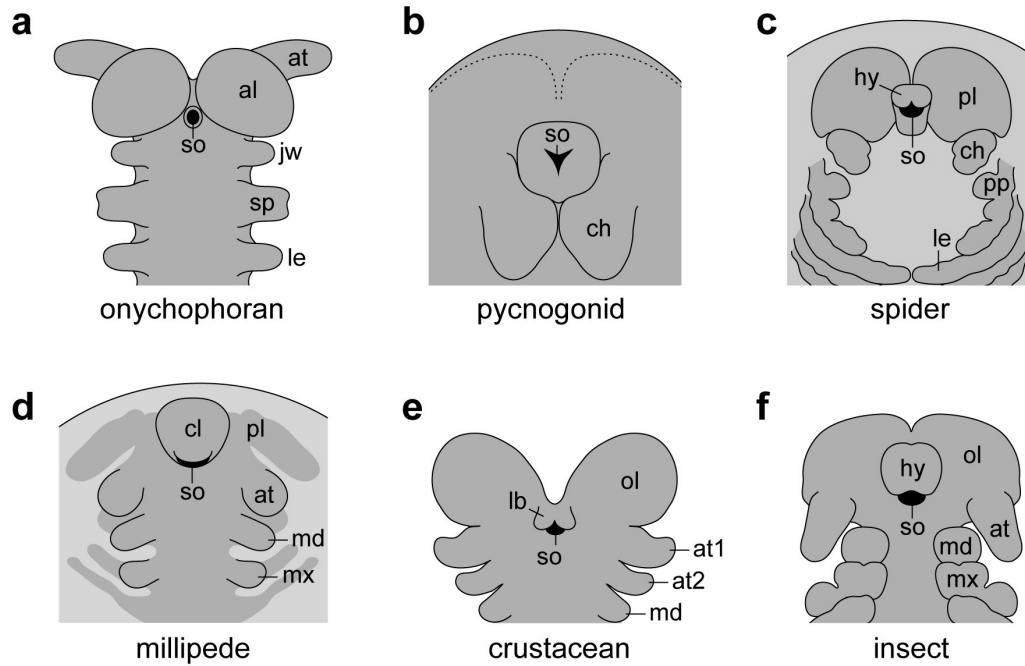

**Supplementary Figure S8 | Position of the stomodaeum in embryos of Onychophora and Arthropoda.** Diagrams of anterior ends in ventral view. **(a)** Onychophoran *Euperipatoides rowelli* (cf. Fig. 3b). **(b)** Pycnogonid *Pseudopallene* sp. (after a confocal micrograph in Brenneis et al. 2011, *Dev. Genes Evol.* 221:309–328). **(c)** Spider *Latrodectus geometricus* (after a scanning electron micrograph in Liu et al. 2009, *Arthropod Struct. Dev.* 38:401–416). **(d)** Millipede *Glomeris marginata* (after a drawing by Dohle 1964, *Zool. Jb. Anat.* 81:241–310). **(e)** Crustacean *Gammarus pulex* (after a drawing by Weygoldt 1959, *Zool. Jb. Anat.* 77:51–110). **(f)** Cricket *Gryllus assimilis* (after a scanning electron micrograph in Liu et al. 2010, *Arthropod Struct. Dev.* 39:382–395). al, antennal lobe; at, antenna; at1–at2, first and second antenna (in crustaceans only); ch, chelifere/chelicera; cl, clypeus; hy, hypostome; jw, jaw; lb, labrum; le, leg; md, mandible; mx, maxilla; ol, optic lobe; pl, protocerebral lobe; pp, pedipalp; so, stomodaeum; sp, slime papilla.

## Supplementary table

Supplementary Table S1 | Specimens of the Early Cambrian lobopodian *Onychodictyon ferox* studied. Preserved head structures are indicated by “+”.

| #  | ID             | Proboscis | Mouth opening | Buccal tube | Pharyngeal bulb <sup>1</sup> | Eye | Antennal rachis | Antennal branches | Arcuate sclerite | Brief description                                                                                                                                         |
|----|----------------|-----------|---------------|-------------|------------------------------|-----|-----------------|-------------------|------------------|-----------------------------------------------------------------------------------------------------------------------------------------------------------|
| 1  | ELEL-SJ 080756 | –         | –             | –           | –                            | –   | –               | –                 | –                | Incomplete, compressed dorsoventrally, with paired sclerotised plates                                                                                     |
| 2  | ELEL-SJ 080903 | –         | –             | –           | –                            | –   | –               | –                 | –                | Incomplete (head missing), compressed dorsolaterally, with distinct body annulation, paired sclerotised plates and dermal papillae                        |
| 3  | ELEL-SJ 080947 | –         | –             | –           | –                            | –   | –               | –                 | –                | Incomplete, compressed laterally, with dermal papillae and legs with paired claws                                                                         |
| 4  | ELEL-SJ 080995 | –         | –             | –           | –                            | –   | +               | + <sup>2</sup>    | –                | Incomplete, compressed dorsoventrally, with ten pairs of sclerotised plates                                                                               |
| 5  | ELEL-SJ 081005 | –         | –             | –           | –                            | –   | –               | –                 | –                | Incomplete, compressed dorsoventrally, with paired sclerotised plates                                                                                     |
| 6  | ELEL-SJ 081007 | –         | –             | –           | –                            | –   | –               | –                 | –                | Incomplete, compressed laterally, with dermal papillae, legs with paired claws                                                                            |
| 7  | ELEL-SJ 081051 | +         | –             | –           | –                            | –   | –               | –                 | +                | Nearly complete, compressed laterally, with distinct body annulation, dermal papillae, twelve pairs of legs and ten pairs of sclerotised plates           |
| 8  | ELEL-SJ 081052 | +         | –             | –           | +                            | +   | –               | –                 | +                | Nearly complete, compressed laterally, with twelve pairs of legs and ten pairs of sclerotised plates, gut with dark fossilised content in positive relief |
| 9  | ELEL-SJ 081053 | +         | –             | –           | –                            | –   | –               | –                 | +                | Incomplete, compressed laterally, with attachment site of one antenna preserved                                                                           |
| 10 | ELEL-SJ 081054 | +         | –             | –           | –                            | –   | –               | –                 | +                | Nearly complete, compressed laterally, with distinct body annulation and ten pairs of sclerotised plates, legs with paired claws                          |
| 11 | ELEL-SJ 081056 | –         | –             | –           | –                            | –   | –               | –                 | –                | Incomplete, compressed laterally, with preserved dermal papillae                                                                                          |
| 12 | ELEL-SJ 081072 | –         | –             | –           | –                            | –   | +               | +                 | –                | Incomplete, compressed laterally, with distinct body annulation and dermal papillae, legs with paired claws                                               |
| 13 | ELEL-SJ 081074 | –         | –             | –           | –                            | –   | +               | –                 | –                | Incomplete, compressed laterally, with distinct body annulation and dermal papillae, legs with paired claws                                               |
| 14 | ELEL-SJ 081081 | +         | +             | +           | –                            | –   | +               | + <sup>2</sup>    | +                | Incomplete, compressed laterally, with preserved dermal papillae and ten pairs of sclerotised plates                                                      |
| 15 | ELEL-SJ 081105 | –         | –             | –           | –                            | –   | –               | –                 | –                | Nearly complete, compressed laterally, with distinct body annulation and sclerotised plates, legs with claws                                              |

|    |                   |   |   |   |   |   |   |   |   |                                                                                                                                                               |
|----|-------------------|---|---|---|---|---|---|---|---|---------------------------------------------------------------------------------------------------------------------------------------------------------------|
| 16 | ELEL-SJ<br>081134 | - | - | - | - | - | - | - | - | Incomplete, compressed dorsoventrally, with distinct body annulation                                                                                          |
| 17 | ELEL-SJ<br>081137 | - | - | - | - | - | + | + | - | Incomplete, compressed dorsoventrally, with distinct body annulation, legs with paired claws                                                                  |
| 18 | ELEL-SJ<br>081157 | - | - | - | - | + | + | + | - | Nearly complete, compressed laterally, with distinct body annulation and ten pairs of sclerotised plates, legs with paired claws, antennal annuli preserved   |
| 19 | ELEL-SJ<br>081165 | + | - | - | - | - | + | + | + | Nearly complete, compressed laterally, with distinct body annulation, legs with claws                                                                         |
| 20 | ELEL-SJ<br>081166 | - | - | - | - | - | - | - | - | Incomplete, compressed laterally, with dermal papillae and ten pairs of sclerotised plates and long spines                                                    |
| 21 | ELEL-SJ<br>081183 | - | - | - | - | - | - | - | - | Incomplete, compressed laterally, with preserved dermal papillae                                                                                              |
| 22 | ELEL-SJ<br>081184 | - | - | - | - | - | - | - | - | Incomplete, compressed dorsoventrally                                                                                                                         |
| 23 | ELEL-SJ<br>081185 | - | - | - | - | - | - | - | + | Incomplete, compressed dorsoventrally, with distinct body annulation                                                                                          |
| 24 | ELEL-SJ<br>081201 | - | - | - | - | - | + | + | + | Nearly complete, compressed dorsoventrally, most likely a juvenile, with prominent antennae                                                                   |
| 25 | ELEL-SJ<br>081209 | - | - | - | - | - | - | - | - | Incomplete, compressed dorsoventrally, with distinct body annulation                                                                                          |
| 26 | ELEL-SJ<br>081210 | + | - | + | - | + | + | + | + | Nearly complete, compressed laterally, with distinct body annulation and ten pairs of sclerotised plates, gut with dark fossilised content in positive relief |
| 27 | ELEL-SJ<br>100226 | + | - | - | - | - | + | - | + | Incomplete, compressed laterally, with distinct body annulation and dermal papillae                                                                           |
| 28 | ELEL-SJ<br>100227 | - | - | - | - | - | + | + | + | Incomplete, compressed dorsoventrally, paired legs with claws, paired sclerotised plates                                                                      |
| 29 | ELEL-SJ<br>100230 | - | - | - | - | + | + | - | - | Incomplete, compressed laterally, with distinct body annulation, paired sclerotised plates and paired legs with claws                                         |
| 30 | ELEL-SJ<br>100231 | - | - | - | - | - | - | - | + | Incomplete, compressed dorsoventrally, with distinct body annulation, paired sclerotised plates and legs with paired claws                                    |
| 31 | ELEL-SJ<br>100234 | - | - | - | - | - | - | - | - | Incomplete, compressed dorsoventrally, paired legs, paired sclerotised plates, dermal papillae, distinct body annulation                                      |
| 32 | ELEL-SJ<br>100235 | - | - | - | - | - | - | - | - | Incomplete (head missing), compressed laterally, paired sclerotised plates, with distinct body annulation                                                     |
| 33 | ELEL-SJ<br>100236 | + | - | - | - | + | + | + | + | Incomplete, compressed laterally, with distinct body annulation, sclerotised plates and legs with claws                                                       |

|    |                   |   |   |   |   |   |   |   |   |                                                                                                                                        |
|----|-------------------|---|---|---|---|---|---|---|---|----------------------------------------------------------------------------------------------------------------------------------------|
| 34 | ELEL-SJ<br>100237 | + | + | + | - | - | + | - | + | Nearly complete, compressed laterally, with twelve pairs of legs and ten pairs of sclerotised plates, legs with paired claws           |
| 35 | ELEL-SJ<br>100238 | + | - | - | - | - | + | + | + | Incomplete, compressed laterally, with distinct body annulation, dermal papillae and legs with paired claws                            |
| 36 | ELEL-SJ<br>100239 | + | + | + | + | + | + | - | + | Incomplete, compressed laterally, with distinct body annulation and legs with paired claws                                             |
| 37 | ELEL-SJ<br>100244 | - | - | - | - | - | + | - | + | Nearly complete, compressed dorsoventrally, with distinct body annulation and ten pairs of sclerotised plates                          |
| 38 | ELEL-SJ<br>100245 | + | - | - | - | - | + | - | + | Nearly complete, compressed dorsoventrally, with distinct body annulation                                                              |
| 39 | ELEL-SJ<br>100249 | - | - | - | - | - | - | - | - | Incomplete (head missing), compressed dorsolaterally, paired sclerotised plates, distinct body annulation                              |
| 40 | ELEL-SJ<br>100250 | + | - | + | + | + | + | - | + | Incomplete, compressed laterally, with distinct body annulation, dermal papillae and sclerotised plates with elongated spines          |
| 41 | ELEL-SJ<br>100255 | + | - | - | + | - | - | - | + | Complete, compressed laterally, legs with paired claws, paired sclerotised plates, distinct body annulation                            |
| 42 | ELEL-SJ<br>100256 | + | - | + | + | - | - | - | + | Nearly complete, curled up and compressed laterally, with distinct body annulation                                                     |
| 43 | ELEL-SJ<br>100257 | - | - | - | - | - | - | - | - | Incomplete (head missing), compressed laterally, paired sclerotised plates, distinct body annulation, dermal papillae, legs with claws |
| 44 | ELEL-SJ<br>100260 | + | - | + | + | + | + | - | + | Nearly complete, compressed laterally, with distinct body annulation, dermal papillae and legs with claws                              |
| 45 | ELEL-SJ<br>100268 | - | - | - | - | - | + | - | - | Incomplete, compressed laterally, with distinct body annulation and dermal papillae                                                    |
| 46 | ELEL-SJ<br>100272 | + | + | + | + | + | + | + | + | Incomplete, compressed laterally, with dermal papillae and legs with paired claws                                                      |
| 47 | ELEL-SJ<br>100307 | + | + | + | + | + | + | - | + | Incomplete, compressed laterally, with distinct body annulation, an eye with a lens-like structure and legs with paired claws          |
| 48 | ELEL-SJ<br>100329 | - | - | - | - | - | + | + | + | Nearly complete, compressed dorsoventrally, with twelve pairs of legs and ten pairs of sclerotised plates                              |
| 49 | ELEL-SJ<br>100335 | - | - | - | - | - | + | - | + | Nearly complete, compressed laterally, paired legs with claws, paired sclerotised plates, distinct body annulation                     |
| 50 | ELEL-SJ<br>100336 | - | - | - | - | - | + | - | + | Incomplete, compressed laterally, with preserved dermal papillae and legs with paired claws                                            |
| 51 | ELEL-SJ<br>100340 | - | - | - | - | - | - | - | - | Incomplete, compressed laterally, with paired sclerotised plates, distinct body annulation and dermal papillae                         |

|    |                   |   |   |   |   |   |   |   |   |                                                                                                                                                                              |
|----|-------------------|---|---|---|---|---|---|---|---|------------------------------------------------------------------------------------------------------------------------------------------------------------------------------|
| 52 | ELEL-SJ<br>100383 | - | - | - | - | - | - | - | - | Incomplete (anterior part missing), compressed laterally, with paired sclerotised plates and distinct body annulation                                                        |
| 53 | ELEL-SJ<br>100438 | + | + | + | + | - | - | - | + | Incomplete, compressed laterally, with distinct body annulation, sclerotised plates and legs with claws                                                                      |
| 54 | ELEL-SJ<br>100469 | + | - | + | - | - | + | - | + | Incomplete, compressed laterally, with distinct body annulation (five annuli in each interpedal region between each two pairs of sclerotised plates), legs with paired claws |
| 55 | ELEL-SJ<br>100471 | + | + | + | - | - | + | + | - | Incomplete, compressed laterally, gut with dark fossilised content in positive relief                                                                                        |
| 56 | ELEL-SJ<br>100471 | + | - | - | + | - | + | + | + | Nearly complete, compressed laterally, with twelve pairs of legs and ten pairs of sclerotised plates, legs with paired claws                                                 |
| 57 | ELEL-SJ<br>100475 | + | - | + | - | - | + | + | + | Nearly complete, compressed laterally, with distinct body annulation, dermal papillae and legs with claws                                                                    |
| 58 | ELEL-SJ<br>100479 | + | - | - | - | - | + | + | - | Nearly complete, compressed laterally, with distinct body annulation, dermal papillae and legs with claws                                                                    |
| 59 | ELEL-SJ<br>100545 | + | - | - | - | - | - | - | - | Nearly complete, compressed laterally, with distinct body annulation and dermal papillae                                                                                     |
| 60 | ELEL-SJ<br>100546 | + | - | - | - | + | + | + | + | Nearly complete, compressed laterally, with ten pairs of sclerotised plates, gut with dark fossilised content in positive relief                                             |
| 61 | ELEL-SJ<br>100555 | - | - | - | - | - | + | + | + | Incomplete, compressed dorsoventrally, most likely a juvenile, with distinct body annulation, sclerotised plates and prominent antennae                                      |
| 62 | ELEL-SJ<br>100559 | - | - | - | - | - | - | - | - | Incomplete, compressed dorsoventrally, with paired sclerotised plates, distinct body annulation and legs with paired claws                                                   |
| 63 | ELEL-SJ<br>100561 | + | + | + | + | - | - | - | + | Incomplete, compressed laterally, with paired sclerotised plates, distinct body annulation and legs with paired claws                                                        |
| 64 | ELEL-SJ<br>100563 | + | - | - | - | - | + | - | + | Nearly complete, compressed laterally, with distinct body annulation, twelve pairs of legs and ten pairs of sclerotised plates, legs with paired claws                       |
| 65 | ELEL-SJ<br>100564 | - | - | - | - | - | + | - | + | Nearly complete, compressed dorsolaterally, with distinct body annulation, sclerotised plates and paired legs with claws                                                     |
| 66 | ELEL-SJ<br>100565 | + | - | - | - | - | - | - | + | Nearly complete, curled up and compressed laterally, with distinct body annulation                                                                                           |
| 67 | ELEL-SJ<br>100571 | + | - | - | - | - | + | - | + | Incomplete, compressed laterally, with distinct body annulation and sclerotised plates with long spines                                                                      |
| 68 | ELEL-SJ<br>100575 | - | - | - | - | - | - | - | - | Incomplete, compressed laterally, with distinct body annulation, dermal papillae and legs with claws                                                                         |
| 69 | ELEL-SJ<br>100581 | - | - | - | - | - | - | - | - | Incomplete (head missing), compressed dorsolaterally, with distinct body annulation and sclerotised plates                                                                   |

|    |                   |   |   |   |   |   |   |   |   |                                                                                                                                                    |
|----|-------------------|---|---|---|---|---|---|---|---|----------------------------------------------------------------------------------------------------------------------------------------------------|
| 70 | ELEL-SJ<br>100591 | + | - | - | - | - | - | - | + | Incomplete, compressed laterally, with distinct body annulation and legs with claws                                                                |
| 71 | ELEL-SJ<br>100602 | + | + | + | + | + | + | + | + | Nearly complete, curled up and compressed laterally, with distinct body annulation, sclerotised plates with long spines and legs with paired claws |
| 72 | ELEL-SJ<br>100625 | + | - | - | - | - | + | + | + | Nearly complete, compressed dorsoventrally, with distinct body annulation, twelve pairs of legs and ten pairs of sclerotised plates                |
| 73 | ELEL-SJ<br>100627 | - | - | - | - | - | - | - | - | Incomplete, compressed dorsoventrally, with distinct body annulation, paired sclerotised plates and legs with paired claws                         |
| 74 | ELEL-SJ<br>100635 | + | + | + | + | + | + | + | + | Incomplete, compressed laterally, with distinct body annulation and dermal papillae                                                                |
| 75 | ELEL-SJ<br>100736 | + | + | + | + | + | - | - | + | Nearly complete, compressed laterally, with twelve pairs of legs and ten pairs of sclerotised plates                                               |
| 76 | ELEL-SJ<br>100737 | + | + | + | - | + | + | + | + | Incomplete, compressed laterally, with distinct body annulation and preserved attachment site of the right antenna                                 |
| 77 | ELEL-SJ<br>100743 | + | + | + | + | - | + | - | + | Nearly complete, compressed laterally, with distinct body annulation, twelve pairs of legs and ten pairs of sclerotised plates                     |
| 78 | ELEL-SJ<br>100745 | - | - | - | - | - | - | - | - | Incomplete, compressed laterally, with distinct body annulation, paired sclerotised plates and paired legs                                         |
| 79 | ELEL-SJ<br>100759 | + | - | + | - | + | + | - | + | Nearly complete, compressed laterally, with distinct body annulation, twelve pairs of legs and ten pairs of sclerotised plates                     |
| 80 | ELEL-SJ<br>100782 | - | - | - | - | - | - | - | - | Incomplete, compressed laterally, with distinct body annulation, paired sclerotised plates and paired legs                                         |
| 81 | ELEL-SJ<br>100808 | + | - | - | - | - | - | - | + | Incomplete, compressed laterally, with sclerotised plates and legs with claws                                                                      |
| 82 | ELEL-SJ<br>100815 | - | - | - | - | - | - | - | - | Incomplete, compressed dorsoventrally, with distinct body annulation, paired sclerotised plates and legs with paired claws                         |
| 83 | ELEL-SJ<br>100821 | - | - | - | - | - | - | - | - | Incomplete (head missing), compressed laterally, with distinct body annulation, paired sclerotised plates and intestine                            |
| 84 | ELEL-SJ<br>100823 | - | - | - | - | - | + | - | + | Nearly complete, compressed laterally, with distinct body annulation, paired sclerotised plates and paired legs with claws                         |
| 85 | ELEL-SJ<br>100859 | - | - | - | - | - | + | + | + | Incomplete, compressed laterally, with distinct body annulation, sclerotised plates and legs with claws                                            |
| 86 | ELEL-SJ<br>100862 | - | - | - | - | - | + | + | + | Nearly complete, compressed dorsoventrally, with anteriorly directed antennae                                                                      |
| 87 | ELEL-SJ<br>100864 | - | - | - | - | - | - | - | - | Incomplete, compressed laterally, with paired sclerotised plates and paired legs with claws                                                        |

|     |                   |   |   |   |   |   |   |   |   |                                                                                                                                                    |
|-----|-------------------|---|---|---|---|---|---|---|---|----------------------------------------------------------------------------------------------------------------------------------------------------|
| 88  | ELEL-SJ<br>100868 | - | - | - | - | - | - | - | - | Nearly complete, compressed dorsoventrally, with distinct body annulation, paired sclerotised plates and paired legs                               |
| 89  | ELEL-SJ<br>100872 | + | + | - | + | - | - | - | + | Nearly complete, compressed laterally, with distinct body annulation, dermal papillae, paired sclerotised plates and paired legs with paired claws |
| 90  | ELEL-SJ<br>100873 | - | - | - | - | - | - | - | + | Incomplete, compressed dorsoventrally, with paired sclerotised plates and paired legs                                                              |
| 91  | ELEL-SJ<br>100898 | + | - | - | - | + | + | - | + | Incomplete, compressed laterally, with distinct body annulation and legs with claws                                                                |
| 92  | ELEL-SJ<br>100899 | + | - | - | - | - | + | - | + | Incomplete, compressed laterally, with distinct body annulation, sclerotised plates and legs with claws                                            |
| 93  | ELEL-SJ<br>100900 | + | + | + | + | + | - | - | + | Nearly complete, compressed laterally, with dermal papillae, twelve pairs of legs and ten pairs of sclerotised plates, legs with paired claws      |
| 94  | ELEL-SJ<br>100910 | + | + | - | - | - | - | - | + | Incomplete, compressed laterally (head in an exceptional, nearly frontal view), with preserved dermal papillae                                     |
| 95  | ELEL-SJ<br>100917 | - | - | - | - | - | + | + | + | Nearly complete, compressed dorsoventrally, shape of arcuate sclerite clearly distinguishable                                                      |
| 96  | ELEL-SJ<br>100919 | + | + | + | + | - | - | - | + | Incomplete, compressed laterally, with distinct body annulation, dermal papillae and legs with paired claws                                        |
| 97  | ELEL-SJ<br>100941 | + | - | + | - | - | + | + | + | Nearly complete, compressed laterally, with distinct body annulation, dermal papillae and legs with paired claws                                   |
| 98  | ELEL-SJ<br>100944 | - | - | - | - | - | - | - | - | Incomplete, compressed laterally, with distinct body annulation, dermal papillae and paired sclerotised plates                                     |
| 99  | ELEL-SJ<br>100953 | + | - | - | - | - | + | + | + | Nearly complete, compressed laterally, with distinct body annulation, dermal papillae, twelve pairs of legs and ten pairs of sclerotised plates    |
| 100 | ELEL-SJ<br>100969 | - | - | - | - | - | - | - | - | Incomplete (head missing), compressed laterally, with distinct body annulation, dermal papillae and paired sclerotised plates                      |
| 101 | ELEL-SJ<br>100996 | + | - | - | - | - | + | - | + | Nearly complete, curled up and compressed laterally, with preserved dermal papillae and legs with paired claws                                     |
| 102 | ELEL-SJ<br>101011 | - | - | - | - | - | - | - | + | Nearly complete, compressed dorsoventrally, with distinct body annulation, paired sclerotised plates and paired legs                               |
| 103 | ELEL-SJ<br>101017 | - | - | - | + | + | - | - | + | Incomplete, compressed laterally, with twelve pairs of legs, ten pairs of sclerotised plates, dermal papillae and legs with paired claws           |
| 104 | ELEL-SJ<br>101020 | - | - | - | - | - | - | - | - | Incomplete, with distinct body annulation, paired sclerotised plates and legs with paired claws                                                    |
| 105 | ELEL-SJ<br>101166 | - | - | - | - | - | + | + | + | Incomplete, preserved laterally, with distinct body annulation and legs with claws                                                                 |

|     |                   |   |   |   |   |   |   |                |   |                                                                                                                                                        |
|-----|-------------------|---|---|---|---|---|---|----------------|---|--------------------------------------------------------------------------------------------------------------------------------------------------------|
| 106 | ELEL-SJ<br>101189 | - | - | - | - | - | - | -              | - | Incomplete, compressed dorsoventrally, with dermal papillae, paired sclerotised plates and paired legs                                                 |
| 107 | ELEL-SJ<br>101206 | - | - | - | - | - | + | -              | + | Incomplete, compressed dorsoventrally, with distinct body annulation and dermal papillae                                                               |
| 108 | ELEL-SJ<br>101223 | - | - | - | - | - | - | -              | - | Incomplete, compressed laterally, with distinct body annulation and dermal papillae                                                                    |
| 109 | ELEL-SJ<br>101232 | + | - | - | - | - | - | -              | + | Incomplete, compressed laterally, with distinct body annulation and legs with claws                                                                    |
| 110 | ELEL-SJ<br>101236 | - | - | - | - | - | + | + <sup>2</sup> | - | Nearly complete, compressed laterally, with ten sclerotised plates and dermal papillae, legs with paired claws                                         |
| 111 | ELEL-SJ<br>101245 | + | - | - | - | - | + | +              | + | Incomplete, compressed laterally, with distinct body annulation and preserved attachment site of the right antenna                                     |
| 112 | ELEL-SJ<br>101248 | + | - | - | - | - | - | -              | + | Incomplete, compressed laterally, with distinct body annulation and dermal papillae, co-preserved with a specimen of <i>Cardiodictyon catenulum</i>    |
| 113 | ELEL-SJ<br>101278 | + | - | - | - | - | - | -              | + | Nearly complete, compressed laterally, with distinct body annulation, paired sclerotised plates and legs with paired claws                             |
| 114 | ELEL-SJ<br>101311 | - | - | - | - | - | + | -              | - | Nearly complete, compressed dorsolaterally, with distinct body annulation, paired sclerotised plates and legs with paired claws                        |
| 115 | ELEL-SJ<br>101320 | - | - | - | - | - | - | -              | - | Incomplete, compressed laterally, with preserved dermal papillae and legs with paired claws                                                            |
| 116 | ELEL-SJ<br>101323 | + | - | - | - | - | + | + <sup>2</sup> | + | Nearly complete, compressed laterally, with distinct body annulation, twelve pairs of legs and ten pairs of sclerotised plates, legs with paired claws |
| 117 | ELEL-SJ<br>101329 | + | - | - | - | - | + | -              | + | Incomplete, compressed dorsolaterally, with distinct body annulation, paired sclerotised plates and paired legs                                        |
| 118 | ELEL-SJ<br>101334 | + | + | - | + | - | + | +              | + | Incomplete, compressed laterally, with distinct body annulation and dermal papillae                                                                    |
| 119 | ELEL-SJ<br>101372 | - | - | - | - | - | - | -              | - | Incomplete, compressed dorsoventrally, with distinct body annulation, paired sclerotised plates and paired legs with claws                             |
| 120 | ELEL-SJ<br>101398 | - | - | - | - | - | - | -              | - | Incomplete, compressed laterally, with distinct body annulation, prominent ventral papillae and curved legs                                            |
| 121 | ELEL-SJ<br>101408 | - | - | - | - | - | + | -              | + | Incomplete, compressed laterally, with sclerotised plates and legs with claws                                                                          |
| 122 | ELEL-SJ<br>101426 | - | - | - | - | - | - | -              | - | Incomplete, compressed laterally, with paired sclerotised plates, paired legs with claws, dermal papillae and intestine                                |
| 123 | ELEL-SJ<br>101427 | - | - | - | - | - | + | +              | + | Incomplete, compressed laterally, with body annulation (five annuli in each interpedal region), legs with paired claws                                 |



|     |                   |   |   |   |   |   |   |                |   |                                                                                                                                                               |
|-----|-------------------|---|---|---|---|---|---|----------------|---|---------------------------------------------------------------------------------------------------------------------------------------------------------------|
| 124 | ELEL-SJ<br>101432 | - | - | - | - | - | - | -              | - | Incomplete, compressed laterally, with distinct body annulation, paired sclerotised plates and paired legs                                                    |
| 125 | ELEL-SJ<br>101435 | - | - | - | - | - | + | +              | - | Nearly complete, compressed laterally, with twelve pairs of legs and ten pairs of sclerotised plates, legs with paired claws                                  |
| 126 | ELEL-SJ<br>101436 | + | - | + | + | + | + | + <sup>2</sup> | + | Nearly complete, compressed dorsoventrally, with twelve pairs of legs and ten pairs of sclerotised plates                                                     |
| 127 | ELEL-SJ<br>101437 | - | - | - | - | - | - | -              | - | Incomplete, compressed dorsoventrally, with distinct body annulation, paired sclerotised plates and paired legs with claws                                    |
| 128 | ELEL-SJ<br>101467 | - | - | + | - | + | + | +              | + | Nearly complete, compressed laterally, with a preserved attachment site of one antenna                                                                        |
| 129 | ELEL-SJ<br>101489 | - | - | - | - | - | - | -              | - | Incomplete, compressed dorsoventrally, with paired sclerotised plates                                                                                         |
| 130 | ELEL-SJ<br>101490 | - | - | - | + | - | + | +              | + | Fragmented, compressed dorsoventrally, with distinct body annulation and paired sclerotised plates                                                            |
| 131 | ELEL-SJ<br>101508 | - | - | - | - | - | + | +              | + | Nearly complete, compressed dorsoventrally, with anteriorly directed antennae                                                                                 |
| 132 | ELEL-SJ<br>101534 | + | - | - | - | - | + | +              | + | Juvenile (associated with an adult), Dorsal view, prominent antennae with branches                                                                            |
| 133 | ELEL-SJ<br>101599 | + | + | + | - | - | + | + <sup>2</sup> | + | Nearly complete, compressed laterally, legs with paired claws                                                                                                 |
| 134 | ELEL-SJ<br>101602 | + | - | - | + | + | + | +              | + | Nearly complete, curled up and compressed laterally, with twelve pairs of legs and ten pairs of sclerotised plates, legs with paired claws                    |
| 135 | ELEL-SJ<br>101606 | - | - | - | - | - | - | -              | - | Incomplete, compressed dorsoventrally, with attachment sites of dermal papillae                                                                               |
| 136 | ELEL-SJ<br>101610 | - | - | - | - | - | - | -              | - | Incomplete, compressed laterally, with distinct body annulation and preserved dermal papillae, co-preserved with a specimen of <i>Cardiodictyon catenulum</i> |
| 137 | ELEL-SJ<br>101624 | + | + | + | - | - | - | -              | + | Nearly complete, compressed laterally, with distinct body annulation, paired sclerotised plates and legs with paired claws                                    |
| 138 | ELEL-SJ<br>101630 | - | - | - | - | - | - | -              | - | Incomplete (head missing), compressed laterally, with distinct body annulation and paired sclerotised plates                                                  |
| 139 | ELEL-SJ<br>101637 | - | - | - | - | - | - | -              | - | Incomplete, compressed laterally, with distinct body annulation, legs with claws and intestine                                                                |
| 140 | ELEL-SJ<br>101701 | + | - | - | - | + | - | -              | + | Nearly complete, compressed laterally, most likely a juvenile, with twelve pairs of legs and ten pairs of sclerotised plates                                  |
| 141 | ELEL-SJ<br>101703 | + | + | + | + | + | + | +              | + | Nearly complete, compressed laterally, with distinct body annulation, dermal papillae, twelve pairs of legs and ten pairs of sclerotised plates               |

|     |                   |   |   |   |   |   |   |                |   |                                                                                                                                                        |
|-----|-------------------|---|---|---|---|---|---|----------------|---|--------------------------------------------------------------------------------------------------------------------------------------------------------|
| 142 | ELEL-SJ<br>101717 | + | + | + | - | - | - | -              | + | Nearly complete, compressed laterally, with distinct body annulation, paired sclerotised plates and legs with paired claws                             |
| 143 | ELEL-SJ<br>101728 | - | - | - | - | + | - | -              | + | Incomplete, compressed laterally, with distinct body annulation and legs with paired claws                                                             |
| 144 | ELEL-SJ<br>101729 | + | - | - | - | - | + | + <sup>2</sup> | + | Nearly complete, compressed laterally, with distinct body annulation, dermal papillae and legs with claws                                              |
| 145 | ELEL-SJ<br>101731 | - | - | - | - | - | + | -              | - | Nearly complete, compressed laterally, with distinct body annulation, twelve pairs of legs and ten pairs of sclerotised plates, legs with paired claws |
| 146 | ELEL-SJ<br>101735 | + | - | + | - | - | + | +              | + | Nearly complete, compressed laterally, with twelve pairs of legs and ten pairs of sclerotised plates, legs with paired claws                           |
| 147 | ELEL-SJ<br>101745 | + | + | + | + | - | + | + <sup>2</sup> | + | Incomplete, compressed laterally, with dermal papillae and distinct body annulation (five annuli in each interpedal region), legs with claws           |
| 148 | ELEL-SJ<br>101749 | - | - | - | - | - | + | +              | - | Incomplete, compressed dorsoventrally, with sclerotised plates                                                                                         |
| 149 | ELEL-SJ<br>101759 | - | - | - | - | - | - | -              | + | Incomplete, compressed laterally, with distinct body annulation, paired sclerotised plates and paired legs with paired claws                           |
| 150 | ELEL-SJ<br>101763 | - | - | - | - | - | + | -              | + | Nearly complete, compressed laterally, with distinct body annulation, twelve pairs of legs and ten pairs of sclerotised plates, legs with paired claws |
| 151 | ELEL-SJ<br>101774 | + | + | + | - | + | + | + <sup>2</sup> | + | Nearly complete, compressed laterally, with distinct body annulation, twelve pairs of legs and ten pairs of sclerotised plates, legs with claws        |
| 152 | ELEL-SJ<br>101781 | + | + | + | + | - | + | -              | + | Three individuals, nearly complete, compressed laterally, with twelve pairs of legs and ten pairs of sclerotised plates, legs with paired claws        |
| 153 | ELEL-SJ<br>101801 | + | + | + | - | + | + | +              | + | Incomplete, compressed laterally, with distinct body annulation and dermal papillae, one antenna directed posteriorly                                  |
| 154 | ELEL-SJ<br>101822 | + | - | - | - | - | - | -              | + | Incomplete, compressed laterally, with distinct body annulation and dermal papillae                                                                    |
| 155 | ELEL-SJ<br>101842 | - | - | - | - | - | + | +              | + | Nearly complete, compressed laterally, with distinct body annulation, paired sclerotised plates and legs with paired claws                             |
| 156 | ELEL-SJ<br>101848 | - | - | - | - | - | + | +              | - | Incomplete, compressed laterally, with distinct body annulation, gut with dark fossilised content in positive relief                                   |
| 157 | ELEL-SJ<br>101888 | + | + | + | - | + | + | + <sup>2</sup> | + | Nearly complete, compressed laterally, with twelve pairs of legs and ten pairs of sclerotised plates                                                   |
| 158 | ELEL-SJ<br>101891 | - | - | - | - | - | - | -              | - | Incomplete, compressed laterally, with distinct body annulation and dermal papillae                                                                    |
| 159 | ELEL-SJ<br>101907 | + | + | + | + | - | - | -              | + | Incomplete, compressed laterally, with distinct body annulation and dermal papillae                                                                    |

|     |                   |   |   |   |   |   |   |   |   |                                                                                                                                                 |
|-----|-------------------|---|---|---|---|---|---|---|---|-------------------------------------------------------------------------------------------------------------------------------------------------|
| 160 | ELEL-SJ<br>101917 | + | - | - | - | - | + | + | + | Nearly complete, curled up and compressed laterally, with preserved attachment site of the left antenna and legs with paired claws              |
| 161 | ELEL-SJ<br>101956 | - | - | - | - | - | - | - | - | Incomplete, compressed laterally, with distinct body annulation, dermal papillae and legs with claws                                            |
| 162 | ELEL-SJ<br>101973 | + | + | + | + | + | + | - | + | Nearly complete, compressed laterally, with distinct body annulation, dermal papillae, twelve pairs of legs and ten pairs of sclerotised plates |
| 163 | ELEL-SJ<br>101980 | - | - | - | + | - | - | - | - | Incomplete (head missing), compressed laterally, with distinct body annulation, paired sclerotised plates and intestine                         |
| 164 | ELEL-SJ<br>101997 | + | - | - | - | - | + | - | + | Nearly complete, compressed laterally, with twelve pairs of legs and ten pairs of sclerotised plates with elongated spines                      |
| 165 | ELEL-SJ<br>102001 | + | - | - | - | - | + | + | + | Nearly complete, compressed laterally, with twelve pairs of legs and ten pairs of sclerotised plates, legs with paired claws                    |
| 166 | ELEL-SJ<br>102010 | + | - | + | - | - | + | + | + | Incomplete, compressed laterally, with distinct body annulation, dermal papillae and one anteriorly directed antenna                            |
| 167 | ELEL-SJ<br>102011 | + | - | + | - | - | + | + | + | Incomplete, compressed laterally, with an annulated antenna                                                                                     |
| 168 | ELEL-SJ<br>102013 | - | - | - | - | - | - | - | - | Incomplete, compressed dorsolaterally, with distinct body annulation, paired sclerotised plates and highly curved legs with paired claws        |
| 169 | ELEL-SJ<br>102015 | + | + | + | - | + | - | - | + | Nearly complete, compressed laterally, with distinct body annulation (five annuli in each interpedal region), legs with paired claws            |
| 170 | ELEL-SJ<br>102016 | - | - | - | + | - | - | - | - | Incomplete, compressed laterally, with distinct body annulation, dermal papillae and legs with paired claws                                     |
| 171 | ELEL-SJ<br>102021 | - | - | - | - | - | + | + | + | Nearly complete, compressed laterally, with twelve pairs of legs and ten pairs of sclerotised plates, legs with paired claws                    |
| 172 | ELEL-SJ<br>102040 | + | + | + | + | - | - | - | + | Incomplete, compressed laterally, with distinct body annulation, sclerotised plates and legs with claws                                         |
| 173 | ELEL-SJ<br>102042 | - | - | - | - | - | - | - | - | Incomplete, compressed dorsoventrally, with distinct body annulation, paired sclerotised plates and paired legs with paired claws               |
| 174 | ELEL-SJ<br>102043 | - | - | - | - | - | + | + | + | Incomplete, compressed dorsoventrally, with distinct body annulation, paired sclerotised plates and paired legs with paired claws               |
| 175 | ELEL-SJ<br>102044 | - | - | - | - | - | - | - | - | Incomplete, compressed dorsoventrally, with paired sclerotised plates, paired legs with paired claws and intestine in the positive relief       |
| 176 | ELEL-SJ<br>102045 | + | + | + | + | - | + | + | + | Incomplete, compressed dorsoventrally, with distinct body annulation, paired sclerotised plates and dermal papillae                             |
| 177 | ELEL-SJ<br>102046 | - | - | - | - | - | - | - | - | Incomplete (head missing), compressed laterally, with distinct body annulation, paired sclerotised plates and dermal papillae                   |

|                          |                   |           |           |           |           |           |           |                |            |                                                                                                                                        |
|--------------------------|-------------------|-----------|-----------|-----------|-----------|-----------|-----------|----------------|------------|----------------------------------------------------------------------------------------------------------------------------------------|
| 178                      | ELEL-SJ<br>102047 | -         | -         | -         | -         | -         | +         | +              | +          | Incomplete, compressed dorsoventrally, with distinct body annulation, paired sclerotised plates and paired legs with paired claws      |
| 179                      | ELEL-SJ<br>102048 | -         | -         | -         | -         | +         | +         | +              | -          | Incomplete, compressed laterally, with distinct body annulation, paired sclerotised plates and prominent ventral papillae              |
| 180                      | ELEL-SJ<br>102049 | -         | -         | -         | +         | -         | -         | -              | +          | Incomplete, compressed laterally, with distinct body annulation, paired sclerotised plates and paired legs with claws                  |
| 181                      | ELEL-SJ<br>102050 | -         | -         | -         | +         | -         | -         | -              | +          | Incomplete, compressed dorsolaterally, with distinct body annulation and paired sclerotised plates                                     |
| 182                      | ELEL-SJ<br>102051 | -         | -         | -         | -         | -         | -         | -              | -          | Incomplete, compressed laterally, with distinct body annulation, paired sclerotised plates and paired legs with claws                  |
| 183                      | ELEL-SJ<br>102052 | -         | -         | -         | -         | -         | -         | -              | -          | Incomplete, compressed laterally, with distinct body annulation, paired sclerotised plates and paired legs with claws                  |
| 184                      | ELEL-SJ<br>102053 | -         | -         | -         | -         | -         | -         | -              | -          | Incomplete, compressed laterally, with distinct body annulation, paired sclerotised plates and paired legs with claws                  |
| 185                      | ELEL-SJ<br>102054 | +         | +         | +         | +         | -         | +         | + <sup>2</sup> | +          | Incomplete, compressed laterally, with distinct body annulation, paired sclerotised plates, dermal papillae and paired legs with claws |
| 186                      | ELEL-SJ<br>102055 | +         | +         | +         | +         | +         | +         | +              | +          | Fragmented, compressed laterally, with distinct body annulation, anterior end and first leg pair with claws preserved                  |
| <b>Total<sup>3</sup></b> |                   | <b>84</b> | <b>34</b> | <b>44</b> | <b>36</b> | <b>32</b> | <b>95</b> | <b>63</b>      | <b>114</b> |                                                                                                                                        |

<sup>1</sup>Expanded pharyngeal lumen is considered as part of the pharyngeal bulb, even if the pharyngeal walls are not seen.

<sup>2</sup>Only the attachment imprints of the antennal branches on the rachis are seen.

<sup>3</sup>Ten additional, highly fragmented or poorly preserved specimens were not included in the table.
